1           **Litter characteristics and helping context during early life shape the**  
2                   **responsiveness of the stress axis in a wild cooperative breeder**

3

4

5   Aurélie Cohas<sup>a</sup>, Coraline Bichet<sup>b</sup>, Rébecca Garcia<sup>a</sup>, Sylvia Pardonnet<sup>a</sup>, Sophie Lardy<sup>a</sup>, Benjamin  
6                                           Rey<sup>a,c,\*</sup>

7

8   <sup>a</sup>Université de Lyon, Université Lyon 1, CNRS, Laboratoire de Biométrie et Biologie Evolutive,  
9   UMR-5558, F-69000 Villeurbanne, France

10   <sup>b</sup>Centre d'Etudes Biologiques de Chizé, CNRS-Université de La Rochelle, UMR-7372, Villiers-  
11   en-Bois, France

12   <sup>c</sup>Wildlife Conservation Physiology, Brain Function Research Group, Faculty of Health Sciences,  
13   University of the Witwatersrand, Johannesburg, South Africa.

14

15

16

17   \* corresponding author: Benjamin Rey, e-mail: [benjamin.rey@univ-lyon1.fr](mailto:benjamin.rey@univ-lyon1.fr)

18

19   Benjamin Rey ORCID ID: 0000-0002-0464-5573

20   Coraline Bichet ORCID ID: 0000-0003-0255-4966

21

22   **Keywords:** cooperative breeding, cortisol, early life, evolution of sociality, hormonal challenge,  
23   rodent.

## 24 **Abstract**

25        Stress responses have evolved to quickly and appropriately deal with environmental stressors  
26 in order to secure or restore homeostasis. Since the regulation of stress hormones plays a key  
27 adaptive role, the regulatory processes controlling stress hormones levels may be under high  
28 selective pressure. The social environment during early life (parents and litter characteristics)  
29 strongly affects ontogeny of the hypothalamic-pituitary-adrenal (HPA) axis. In cooperative  
30 breeders, offspring are also confronted with helpers but whether and how variation in the helping  
31 context can affect HPA axis responsiveness of offspring remains unanswered. Combining  
32 dexamethasone suppression and adrenocorticotrophic hormone stimulation tests, we investigated  
33 the link between the social environment and the characteristics of the HPA axis at the early  
34 stages of life in wild Alpine marmots. We show that when raised in the presence of helpers,  
35 marmot pups exhibit a greater capacity not only to mount, but also to turn off a stress response.  
36 The capacity to mount a stress response was also higher as the pups were raised in large litters.  
37 Determining impacts of such social modulation of the HPA axis functioning on individual fitness  
38 would make an important contribution to our understanding of the evolution of cooperative  
39 breeding.

40

41

## 42 **1. Introduction**

43 Organisms constantly adjust to predictable environmental variations such as daily and  
44 seasonal changes while needing to respond quickly and adequately to unpredictable treats  
45 (Wingfield 2003, 2008). To do so, stress responses have evolved to deal rapidly and  
46 proportionately with environmental stressors in order to maintain or restore a homeostatic state  
47 (Monaghan and Spencer 2014). The stress response consists of a complex set of physiological  
48 changes through the activation of neuronal and endocrine pathways (Sapolsky et al. 2000;  
49 Wingfield 2003) where the hypothalamic-pituitary-adrenal (HPA) axis is the main orchestrator  
50 by regulating the secretion and release of glucocorticoids (de Kloet et al. 2008). At baseline  
51 levels, circadian fluctuations of glucocorticoids (corticosterone and cortisol) regulate  
52 physiological functions and maintain energy homeostasis (McEwen and Wingfield 2003). When  
53 exposed to physiological or psychological stressors, activation of the HPA axis stimulates the  
54 secretion and release of glucocorticoids within minutes, mobilizing energy and preparing  
55 individuals to fight or flight (Wingfield et al. 1998). While a transient increase in glucocorticoids  
56 leads to short-term and immediate benefits, particularly in terms of survival (Wingfield 2008),  
57 chronically elevated glucocorticoid levels carries physiological costs (Romero et al. 2009).  
58 Under high glucocorticoids levels, energy is derived to an emergency state, where physiological  
59 and behavioural adjustments are all directed towards immediate survival, at the expense of other  
60 energy demanding functions such as growth, reproduction or body maintenance (Romero 2004).  
61 Extensive literature, mostly on medical studies in humans and experimental approaches on  
62 laboratory rodents, agree that maintaining high levels of glucocorticoids cause adverse effects on  
63 many vital physiological functions while predisposing to multiple metabolic and immune  
64 disorders and accelerating ageing (for example, see Gassen et al. 2017; Nicolaides et al. 2015).

65 In the wild, chronic elevation of glucocorticoids has been shown to have consequences on  
66 individual fitness with measurable cascading effect at the population level (eg. Boonstra et al.  
67 1998; Dulude-de Broin et al. 2020). Hence, regulatory mechanisms of the stress response which  
68 control both the ability to mount a stress response (the initial response phase to challenge) and  
69 the mechanisms contributing to restore baseline glucocorticoid levels (the recovery phase),  
70 should play a key adaptive role (Crespi et al. 2013; Taff and Vitousek 2016) and thus under high  
71 selective pressure (MacDougall-Shackleton et al. 2013; Bonier and Martin 2016).

72 The stress response is driven by the activation of the HPA axis, which results in the  
73 hypothalamus releases of corticotropin-releasing hormone (CRH), a neuropeptide that stimulate  
74 the secretion of adrenocorticotrophic hormone (ACTH) by the anterior pituitary gland. ACTH is  
75 then transported through bloodstream and stimulates the systemic release of glucocorticoids by  
76 the adrenal cortex (Figure 1a). The adrenocortical reactivity to ACTH is a major determinant of  
77 glucocorticoid elevation in blood and therefore controls the rate of the increase in energy demand  
78 and changes in resources allocation (i.e. emergency life-history stage) during the stress challenge  
79 (Wingfield et al. 1998). Conversely, the primary inhibitory control of HPA axis involves  
80 glucocorticoid-mediated negative feedback on the release of CRH and ACTH, so that the  
81 glucocorticoid levels return to baseline once the threat is dealt with. The reactivity of the adrenal  
82 to ACTH, as well as the effectiveness of negative glucocorticoid feedback, are plastic  
83 physiological traits whose expression aims to optimize the intensity and duration of stress  
84 responses in a given context (Angelier and Wingfield 2013). Although evidences that the  
85 reactivity of HPA traduces into to fitness benefits remains mixed (see Breuner et al. 2008), it is  
86 likely to be under high selective pressure (Bonier and Martin 2016).

87 Both the abiotic and biotic components of the environment can affect individual stress  
88 response (Creel et al. 2013; Grace and Anderson 2018). Experimental approach shows that when  
89 experienced early in life, environmental conditions strongly affect the ontogeny of the HPA axis,  
90 resulting in long-term effects on many physiological and neural functions (McMillen and  
91 Robinson 2005), and contributing greatly to a phenomenon referred as “developmental  
92 programming” (Seckl 2004). For instance, in rats, offspring that received extensive maternal care  
93 in early life showed reduced adrenal reactivity to acute stress, but improved efficacy of  
94 glucocorticoids negative-feedback in adulthood (Liu et al. 1997).

95 The social environment early in life is known to have an impact on glucocorticoids levels  
96 although most of our knowledge in this field comes from experimental approaches. For example,  
97 social deprivation (social isolation: (Malkesman et al. 2006); deprivation of mother and siblings:  
98 (Avishai-Eliner et al. 1995)) or social crowding experienced early in life (Bugajski et al. 1993)  
99 have been shown to cause chronic stress in laboratory rodents. Under natural conditions,  
100 investigations on the effects of the social environment in the early life have showed that litter  
101 size and composition affected circulating glucocorticoid of rat and rabbit pups (Hudson et al.  
102 2011). However, in social species, offspring interact not only with their parents or siblings, but  
103 also with other members of their social groups. In particular, in cooperative breeders, animals  
104 live in kin-based family groups where it is not only the parents who care for the young (Brown  
105 1987), but also non-breeding individuals called helpers (Keller and Reeve 1994). The presence  
106 of helpers early in life has major short- and long-term effects on offspring’s phenotypes and  
107 fitness (*e.g.* Berger et al 2018; Hammers et al 2019), but the underlying physiological  
108 mechanisms are not yet understood. In this study, we tested the hypothesis that the presence of  
109 helpers could modulate the HPA responsiveness of the offspring they care for.

110           In order to investigate whether the social environment (litter characteristics and helping  
111 context) experienced early in life shapes the individual HPA axis responsiveness, we  
112 implemented hormonal challenge protocols in the wild Alpine marmot (*Marmota marmota*).  
113 Alpine marmots are territorial cooperatively breeding ground-dwelling squirrels that live in  
114 family groups of 2 to 16 individuals composed of a dominant pair and sexually mature and  
115 immature subordinates (Allainé 2000). Only the dominant pair reproduces once a year.  
116 Subordinates of both sexes delay dispersal and forgo their own reproduction beyond sexual  
117 maturity (Cohas et al. 2006). However, only subordinate males are considered as helpers, notably  
118 because of their crucial role in thermoregulation which drastically improves the survival of  
119 juveniles during hibernation (Arnold 1988; Allainé and Theuriau 2004) but also because of their  
120 role in the thermoregulation of the pups at night and in the construction of nests. Mating takes  
121 place in the second half of April, gestation lasts 35 days, the females then give birth to altricial  
122 pups and nurse them for 40 days. The pups remain in their natal underground burrows (i.e. in a  
123 buffered environment offering protection from climatic fluctuations and predators) until  
124 weaning, from the last week of June to mid-July, at about 40 days of age. During the whole  
125 nursing period, the impacts of group characteristics on these naïve individuals are thus expected  
126 to be prominent. We previously showed (1) that litter sex composition and size affect male  
127 juvenile Alpine marmot survival and probability to become dominant for both sexes (Dupont et  
128 al. 2015), and (2) that the number of helpers during early life has long-term consequences such  
129 as increased longevity of females (Berger et al. 2015) or alteration of actuarial senescence  
130 pattern in both sexes (Berger et al. 2018). However, whether litter size, sex-ratio and helpers can  
131 impact pups physiological traits remains to be investigated. From these previous studies, we  
132 predict that the pups benefiting from helpers early in life should present increased HPA axis

133 responsiveness with enhanced capacity to rapidly mount and to turn off a stress response. We  
134 also expect the litter size and sex-ratio to affect the HPA axis responsiveness.

135

## 136 **2. Materials and Methods**

### 137 (a) Field methods

138 The study took place in La Grande Sassièrè Nature Reserve (French Alps, 45°29'N, 65°90'E)  
139 where a population of wild Alpine marmots (*Marmota marmota*) is extensively monitored since  
140 1990. As part of a long-term capture-mark-recapture protocol, marmots are captured annually  
141 from mid-April to mid-July using two-door live-capture traps (see Cohas et al. 2006). Once a  
142 year, captured individuals are tranquilized by an intramuscular injection of tiletamine and  
143 zolazepam (Zolétil 100, 0.1 ml.kg<sup>-1</sup>, Virbac, France), sexed, aged, and their social status  
144 (dominant or subordinate) is determined by examining sexual characteristics (scrotum for males  
145 and teats for females). Social status is further confirmed by behavioural observations. Each  
146 animal is individually marked with a microchip (Trovan, Germany) inserted subcutaneously and  
147 a numbered ear-tag. Dominant individuals also received a coloured plastic ear-tag.

148 Fieldwork work was undertaken after the issuance of permit number AP n82010/121 by  
149 the Prefecture of Savoie. All the procedures were approved by the ethical committee of the  
150 University Claude Bernard Lyon 1 (n8BH2012-92 V1, 2017012500169084 v1).

151

### 152 (b) Characterization of the social environment

153 We observed each family group on average 1h per day for a minimum of 30h per year  
154 with sessions being randomly distributed during the activity period. Marmots were observed  
155 from a distance of 80-200 m using 10x50 binoculars and 20x60 monocular telescopes. Ear-tags

156 allowed us to distinguish the sex and social status of individuals and their size allowed us to  
157 categorize them as yearlings, 2-year-olds or adults. Combining these observations with mark-  
158 recapture data, we defined the number of helpers as the number of male subordinates aged 1 year  
159 and older present in a family group from the end of mating to the emergence of the pups. The  
160 number of helpers (median = 1.50, range = 0-4) was not manipulated, but we benefited from the  
161 natural intergroup variability in the number of helpers in this population. Among the 45 pups  
162 studied, 12 were raised in absence of helpers in their family group.

163 From additional daily observations conducted during the whole activity period, we  
164 recorded the date of the pups' first emergence from the natal burrow and the litter size. All pups  
165 of a given litter emerge together. We defined the litter size (median = 4.00, range = 2-6) as the  
166 total number of pups emerging from the same natal burrow. Combining observations with the  
167 capture of the pups, we characterized the composition of the litter by the litter sex-ratio (median  
168 = 0.75, range = 0.25-1), the litter sex-ratio being measured as the number of males in a litter  
169 divided by the litter size. Sibship was further confirmed by parentage analyses (Cohas et al.  
170 2006).

171

#### 172 (c) Corticosterone assay

173 In vertebrates, two adrenal glucocorticoids are secreted: cortisol and corticosterone.  
174 While these two hormones are believed to play a role in the stress response of vertebrates, one is  
175 generally predominant and the cortisol to corticosterone ratio is varies considerably depending  
176 on the species (Koren et al. 2012). In rodents, it is generally accepted that the dominant  
177 glucocorticoid is corticosterone (Cockrem, 2013), and this hormone or its derivatives has been  
178 preferred to cortisol in literature on marmot species (eg. Monclus et al. 2011; Petelle et al. 2017;



179 Blumstein et al. 2018; Price et al. 2018; Pinho et al. 2019). However, there is no consensus on  
180 this point since other authors have shown higher cortisol than corticosterone concentrations in  
181 yellow-bellied marmot plasma (Kastner et al. 1977). Here, we measured total (bound and  
182 unbound) corticosterone in plasma using commercial enzyme immuno-assay kits (Cayman  
183 Chemicals Corticosterone EIA kits n°501320). The assays were carried out in microplates coated  
184 with mouse anti-rabbit IgG and relied on the competition between corticosterone and a  
185 corticosterone-acetylcholinesterase for a limited amount of corticosterone antiserum.  
186 Corticosterone-acetylcholinesterase complexed with the IgG colours the Ellman's reagent in  
187 yellow, the intensity of which is measured spectrophotometrically at 412nm (Xenius, Safas  
188 Instrument) and is inversely proportional to corticosterone in the sample. This assay has been  
189 validated for rodents (see manufacturer's instructions), nevertheless, we checked the specificity  
190 of the corticosterone assay by verifying that the hormone levels measured in a series of plasma  
191 diluted in assay buffer (from 1:5 to 1:20) were parallel to the dilution series of the hormonal  
192 standards. Final assays were performed in duplicate with a volume of 50µL of plasma diluted  
193 1:10. The mean intra-assay coefficient of variation that was calculated for each sample was  
194 6.8%. The corticosterone concentrations were calculated against a standard curve and expressed  
195 as  $\text{pg.mL}^{-1}$ .

196

197 (d) Characterization of the stress axis

198 In 2015, 45 pups from 13 family groups were captured by hand between their first and  
199 third day of emergence from their natal burrow (0 to 2 days after emergence). At emergence,  
200 pups are weaned and beyond the stress hyporesponsive period, which is known to be in the first  
201 half of the period between birth and weaning in rodents (Levine 1994). Immediately upon

202 capture, the pups were transferred to a nearby field laboratory in a burlap bag, before being  
203 tranquilized and tagged as described above. To limit potential confounding effects of  
204 environmental variability, the experiments were all conducted the same year in family groups  
205 occupying valley and south facing territories. Given the size of the overall study site (~0.3 km<sup>2</sup>)  
206 and the low range of altitude (~50m), all studied territories were expected to face very similar  
207 climatic conditions.

208 To assess measures of pup's stress axis responsiveness and resulting corticosterone levels  
209 we recorded complementary measures. Firstly, we applied a dexamethasone suppression test  
210 (Boonstra et al., 1998). Dexamethasone is a synthetic steroid molecule that exerts a negative  
211 feedback on the hypothalamus and the anterior pituitary gland inhibiting the secretion of CRH  
212 and ACTH thus suppressing glucocorticoids release by the adrenal cortex (Fig 1a). Therefore,  
213 measuring the rate of plasma corticosterone disappearance following dexamethasone  
214 administration  $\left(\frac{CORT\ at\ dexamethasone\ injection - suppressed\ CORT\ level}{time\ at\ ACTH\ injection - time\ at\ dexamethasone\ injection}\right)$ , hereafter referred as  
215 “adrenal suppression by dexamethasone”) provides an effective measure of the efficacy of the  
216 negative feedback regulation. In other words, it measures the ability of the HPA to recover from  
217 initial stimulation and to return to baseline level. A low efficiency of negative feedback indicates  
218 a reduced ability to shut-off the release of glucocorticoids, exposing individuals to the adverse  
219 effects of prolonged stress. Such an effect has been observed repeatedly in wild and captive  
220 vertebrate populations subjected to persistent stress (see Dickens and Romero 2013 for review).  
221 Corticosterone concentration measured two hours post-dexamethasone injection (hereafter  
222 referred as “suppressed corticosterone level”) assumes effective inhibition of endogenous CRH  
223 and ACTH secretion. Secondly, we performed an ACTH stimulation test (Boonstra et al., 1998).  
224 Following exogenous ACTH administration, the appearance of the corticosterone in the blood

225  $\left( \frac{\text{stimulated } \text{CORT level} - \text{suppressed } \text{CORT level}}{\text{time at stimulated } \text{CORT level} - \text{time at ACTH injection}} \right)$ , hereafter referred as “adrenal reactivity to  
226 ACTH”) measures the efficiency of the adrenal cortex to produce and release stress hormones  
227 (Fig 1a). In turn, this test informs directly on the reactivity of the adrenal gland and on its  
228 ability to initiate glucocorticoids-dependant adaptive stress responses (Boonstra et al. 1998), a  
229 faster glucocorticoid release after ACTH stimulation indicating a greater physiological capacity  
230 to orchestrate an effective response to a perceived stressor. The corticosterone concentration  
231 measured one hour after ACTH injection (hereafter referred to as “stimulated corticosterone  
232 level”) reflects the secretory activity of the adrenal gland during that time under ACTH  
233 stimulation.

234 Each pup thus underwent three successive blood sampling (Fig 1b) of 200µl consisting in  
235 a small puncture of the great saphenous vein with a 0.5 x 16mm sterile needle (Terumo, Europe).  
236 Blood was collected in heparinized capillary tubes (Microvette, Sarstedt, Germany). Immediately  
237 upon the first blood sampling, pups received an intramuscular injection of dexamethasone  
238 sodium phosphate (D0720000, Sigma-Aldrich, France, 0.4 mg.kg<sup>-1</sup>). A second blood sample was  
239 taken two hours (mean±SD = 1:59±0:01, range = 1:55-2:03) after dexamethasone administration  
240 and was immediately followed by an intramuscular injection of ACTH (Sigma-Aldrich, France,  
241 4.0 IU.kg<sup>-1</sup>). A third blood sample was collected one hour (mean±SD = 0:59±0:01, range = 0:51-  
242 1:08) after ACTH injection. The times between dexamethasone or ACTH injections and blood  
243 sampling were determined from a preliminary trial on 5 individuals for whom multiple blood  
244 samples were taken at different time interval after injections (30 min, 1h, 2h, 3h). For all  
245 individuals, two hours were required to obtain a marked decrease in plasma corticosterone. For 3  
246 of the 5 individuals tested, peak corticosterone level was already reached and corticosterone  
247 concentration decreased two hours after ACTH injections; we thus set the blood sampling at 1

248 hour after the ACTH injection in or protocol. All blood samples were centrifuged for 5 min at  
249 3000×g and the plasma stored in the field at -20°C. At the end of the procedure, pups were  
250 released at their natal burrow. They were observed on a daily basis for 3 days; all individuals  
251 were reintegrated to their family group without any adverse effects being observed.

252

### 253 (e) Statistical analyses

254 To test whether social environment affects corticosterone levels and HPA axis  
255 responsiveness of marmot pups, the suppressed and the stimulated corticosterone levels as well  
256 as the adrenal suppression by dexamethasone and the reactivity of the adrenal gland to ACTH  
257 were entered as dependent variables respectively in two generalized linear mixed models with a  
258 logarithm link and a variance given by a gamma distribution and in two linear mixed models  
259 (LMM). To test for an effect of litter characteristics, the litter size and sex-ratio were entered as  
260 explanatory variables. To test for an effect of the helping context, the number of helpers was  
261 entered as an explanatory variable. Additionally, the sex and the age (in day since emergence  
262 from the natal burrow) of the pup were entered as potential confounding explanatory variables.  
263 To control both for pseudo-replication arising from measures done for several pups of the same  
264 litters sharing a common environment (*e.g.* genetic background, maternal effects, territory  
265 quality), we entered a variable “litter” as a random intercept. Agreeing with our hypotheses, only  
266 additive effects of all the fixed explanatory variables were considered in our models. Although  
267 inspection of the residuals from models including only previous effects did not show any  
268 evidence of potential interaction between the considered explanatory variables, to assure the  
269 robustness of the results obtained from these previous models, we further constructed models

270 with all 2-way interactions. Interactions were removed if not significant following a backward  
271 procedure. Both approaches gave the exact same results.

272 Statistical analyses were performed with R 3.3.1 (R Core Team, 2014). The function  
273 “lmer” in the package “lme4” (Bates et al. 2015) was used to fit GLMMs (Venables and  
274 Ripley 2002) and the package “lmerTest” (Kuznetsova et al. 2016) used to calculate parameter-  
275 specific *p*-values based on Satterthwaite's approximations. We set the level of significance to  $\alpha =$   
276 0.05 and parameter estimates are given as mean  $\pm$  SE.

277

### 278 **3. Results**

279 The average suppressed and stimulated corticosterone levels were  $1837 \pm 877(\text{SD})$  and  
280  $4080 \pm 1703(\text{SD})$   $\text{pg.ml}^{-1}$  respectively (See Supplementary Information). The average adrenal  
281 suppression by dexamethasone and adrenal gland reactivity to ACTH were  $-9.42 \pm 10.70$  (SD)  
282  $\text{pg.ml}^{-1}.\text{min}^{-1}$  and  $37.37 \pm 19.81(\text{SD})$   $\text{pg.ml}^{-1}.\text{min}^{-1}$  respectively (see supplementary material).  
283 Adrenal reactivity to ACTH, adrenal suppression and the suppressed and stimulated  
284 corticosterone levels showed some degree of correlation (Table 1).

285 The suppressed and the stimulated corticosterone levels of the pups were not affected by  
286 the number of helpers in their family groups or the litter sex-ratio (Table 2). The stimulated  
287 corticosterone level was significantly affected by the litter size but not the suppressed  
288 corticosterone level (Table 2).

289 Both the adrenal suppression by dexamethasone (negative feedback, Fig 2a) and the  
290 adrenal gland reactivity to ACTH (Fig 2b) increased with the number of helpers (Table 2). The  
291 litter sex-ratio had no effect on both components of the HPA responsiveness but the litter size  
292 positively affected the adrenal gland reactivity to ACTH in pups (Table 2, Fig 3).

293

## 294 **4. Discussion**

295         We showed that marmot pups raised in naturally contrasting social contexts display  
296 different sensitivity profiles of the HPA axis. An increase in litter size has led to a greater  
297 reactivity to mount a stress response and higher corticosterone level after stimulation by  
298 exogenous ACTH. While the helping context did not impact the corticosterone levels after  
299 stimulation by ACTH or inhibition by dexamethasone, the number of helpers significantly  
300 affected the pup's HPA axis responsiveness: the presence of helpers triggered a higher reactivity  
301 of the adrenal gland to ACTH and a higher hypothalamo-pituitary sensitivity to inhibition by  
302 dexamethasone. These data indicate that, when raised in the presence of helpers, marmot pups  
303 thus exhibit a greater capacity not only to mount but also to turn off a stress response. Although  
304 the four measured physiological traits are not totally independent and showed some degree of  
305 correlations, they seemed to have been shaped by different evolutionary pressures linked to the  
306 social context.

307         We found that litter size but not litter sex-ratio had a significant impact on marmot pups'  
308 adrenal reactivity to ACTH and stimulated corticosterone levels. Such effect is congruent with  
309 extensive literature showing variation in hormones levels linked to litter size. For instance, in  
310 small laboratory mammals (Fey and Trillmich 2008; Roedel et al. 2010), pups from large litters  
311 exhibit higher baseline glucocorticoids levels than pups from small litters due to increased  
312 competition during lactation, particularly in species where the number of offspring exceeds the  
313 number of teats. In contrast, the lack of sex-ratio effect is somehow surprising. Indeed, the sex  
314 composition of litters has been shown to influence the stress hormone levels of offspring  
315 (Benhaiem et al. 2013; Blanco et al. 2006). Both hormonal infusion during pregnancy and

316 competition between siblings had been advanced to modulate the stress hormone levels (Blanco  
317 et al. 2006; Hudson et al. 2011; Benhaiem et al. 2013). Regarding the lack of effect of litter size  
318 and sex-ratio on adrenal suppression and suppressed corticosterone levels, comparison with the  
319 literature is not possible as no study to date have investigated the impact of litter characteristics  
320 on adrenal negative feedback.

321 As predicted, the HPA characteristics depended on the number of helpers present in a  
322 family group. This could arise through direct effects on pups. In Alpine marmots, as in other  
323 cooperative breeders, helpers provide important social support to offspring through babysitting  
324 (Clutton-Brock et al. 2000), food provisioning (Brotherton et al. 2001; Raihani and Ridley 2008),  
325 grouping or social thermoregulation (Arnold 1988). Hence, the beneficial effect of helping can  
326 be expected to allow pups to invest more in somatic functions and to accelerate the ontogeny of  
327 physiological traits such as the HPA axis. If there is no evidence that helping influence the age at  
328 emergence from the natal burrow, helping behaviours clearly enhance offspring phenotypic  
329 quality, notably growth and body mass (Clutton-Brock et al. 2001; Hodge 2005). Despite nothing  
330 is known about an alteration of the HPA axis functioning linked to help received directly as pups  
331 in cooperatively breeding species, the enhanced adrenal reactivity and feedback efficiency we  
332 observed in Alpine marmot pups could arise as benefits of help directed toward pups on HPA  
333 axis ontogeny and rate of maturation. Similarly, social support in humans (Uchino et al. 1996)  
334 and affiliative behaviours in other mammalian species (Hennessy et al. 2009; Tuchscherer et al.  
335 2016) have been shown to affect HPA axis positively.v

336 Effect of helpers could also be indirect, for example by affecting the hormonal status of  
337 the mother. Indeed, maternal effects are a major determinant of offspring HPA axis profile and  
338 previous findings on vertebrates suggest that maternally-induced stress can cause significant

339 variation in the responsiveness of an offspring's HPA axis involving both pre- (Moisiadis and  
340 Matthews 2014) and postnatal developmental mechanisms (Liu et al. 1997; Macri and Wuerbel  
341 2006). Helping context has been shown to modify both maternal condition and physiology  
342 leading to change in maternal allocation in birds (Emlen et al. 1986; Hatchwell 1999; Paquet et  
343 al. 2013; Dixit et al. 2017). In mammals, a reduced number of helpers raises hormone stress  
344 levels of the mothers (Cameron 2004). Effects of helpers in modifying maternal glucocorticoids  
345 levels could thus affect the functioning of the HPA axis in pups.

346 Finally, while the litter and the characteristics of the social group affected the reactivity  
347 of the pituitary-adrenal system of the pups, little or no effect was observed on the corticosterone  
348 levels after stimulation by ACTH or inhibition by dexamethasone. These results are in line with  
349 the previously stated idea that static measures of stress hormone levels do not always allow  
350 capturing information on overall endocrine functions. For instance, glucocorticoid value  
351 measured at the peak of secretion not only poses the problem of whether the peak has been  
352 properly identified, but is may be a poor indicator of the integrated stress response over time  
353 (Romero 2004).

354 Our approach also has limitations. Our protocol requires individuals to be tranquilized  
355 and constrained for several hours, which is hardly feasible for many wild species in their natural  
356 environment. The potential effect of the tranquilizing drug (Zoletil), which consisted in a  
357 combination of tiletamine (a dissociative anesthetic) and zolazepam (a benzodiazepine) should  
358 also be considered. Dissociative anesthetics have little or no adverse effect on the HPA axis  
359 functioning, however, but data on humans showed that benzodiazepines may compromise  
360 adrenocortical steroidogenesis in a dose-dependent manner (Besnier et al. 2016). Although the  
361 effect of zolazepam on HPA has yet to be demonstrated in wildlife, particularly at the dose used,



362 and the doses were standardized per g of body weight to allow comparisons between individuals,  
363 it cannot be formally excluded that the tranquilization impacted our results. While our protocol  
364 allowed to evaluate the propensity of the adrenal gland to release of glucocorticoids into the  
365 bloodstream, there are other regulatory mechanisms that modulate the amplitude and the duration  
366 of the stress response. These include those affecting the pharmacokinetics of glucocorticoids  
367 (e.g. hepatic glucocorticoids metabolism, plasma clearance and excretion (McKay and Cidlowski  
368 2003), and the concentration of binding proteins (Breuner and Orchinik 2002). Applying a  
369 holistic approach has become a necessary need to better understand the adaptive value of the  
370 responses to stress (Rey 2020). Hence, further investigations should focus on whether the social  
371 context impact other regulatory mechanisms such as concentration of glucocorticoids bindings  
372 proteins or the fraction of free hormone that is available for uptake by tissues. Further studies are  
373 also needed to clarify how modulation of the reactivity of the HPA axis by the social context  
374 translates into fitness and by which mechanisms (Breuner et al. 2008).

375 At this stage, we know that early social environment has major repercussions on an  
376 individual's fitness (Beckerman et al. 2002; Lindström 1999). In Alpine marmot, help received  
377 during early life modulates female lifetime reproductive success (Berger et al. 2015) and both  
378 male and female actuarial senescence (Berger et al. 2018). Moreover, litter sex composition  
379 affects male juvenile survival and both male and female probabilities of reaching dominant status  
380 (Dupont et al. 2015). These very same social factors were the ones we found to modulate the  
381 reactivity of the HPA. Whether these factors, and more particularly helpers in cooperative  
382 breeders, could influence such long-lasting effects through an early programming of the HPA  
383 axis remain to be investigated and the following questions need to be answered: to what extent

384 social programming of the HPA axis occur and why? To what extent these induced changes are  
385 reversible? Are these changes adaptive or do they reflect potential constraints?

386

### 387 **Acknowledgements**

388 We thank all the students and field assistants in marmot catching. We are grateful to the  
389 municipality of Tignes for the use of the Santel chalet.

390

391

### 392 **References**

393 Allainé D (2000). Sociality, mating system and reproductive skew in marmots: evidence and  
394 hypotheses. *Behav Processes* 51:21–34. [https://doi.org/10.1016/S0376-6357\(00\)00116-9](https://doi.org/10.1016/S0376-6357(00)00116-9)

395 Allainé D, Theuriau F (2004). Is there an optimal number of helpers in Alpine marmot family  
396 groups? *Behav Ecol* 15:916–924. <https://doi.org/10.1093/beheco/arh096>

397 Angelier F, Wingfield JC (2013). Importance of the glucocorticoid stress response in a changing  
398 world: Theory, hypotheses and perspectives. *Gen Comp Endocrinol* 190:118–128.  
399 <https://doi.org/10.1016/j.ygcen.2013.05.022>

400 Arnold W (1988). Social Thermoregulation During Hibernation in Alpine Marmots (*Marmota*  
401 *marmota*). *J Comp Physiol Biochem Syst Environ Physiol* 158:151–156.  
402 <https://doi.org/10.1007/BF01075828>

403 Avishai-Eliner S, Yi S-J, Newth CJL, Baram TZ (1995). Effects of maternal and sibling  
404 deprivation on basal and stress induced hypothalamic-pituitary-adrenal components in the  
405 infant rat. *Neurosci Lett* 192:49–52.

- 406 Bates D, Maechler M, Bolker BM, Walker SC (2015). Fitting Linear Mixed-Effects Models  
407 Using lme4. *J Stat Softw* 67:1–48.
- 408 Beckerman A, Benton TG, Ranta E, Kaitala V, Lundberg P (2002). Population dynamic  
409 consequences of delayed life-history effects. *Trends Ecol Evol* 17:263–269.  
410 [https://doi.org/10.1016/S0169-5347\(02\)02469-2](https://doi.org/10.1016/S0169-5347(02)02469-2)
- 411 Benhaiem S, Hofer H, Dehnhard M, Helms J, East ML (2013). Sibling competition and hunger  
412 increase allostatic load in spotted hyaenas. *Biol Lett* 9:20130040.  
413 <https://doi.org/10.1098/rsbl.2013.0040>
- 414 Berger V, Lemaitre J-F, Allainé D, Gaillard J-M, Cohas A (2018). Early and adult social  
415 environments shape sex-specific actuarial senescence patterns in a cooperative breeder.  
416 *Am Nat* 192:525–536. <https://doi.org/10.1086/699513>
- 417 Berger V, Lemaitre J-F, Gaillard J-M, Cohas A (2015). How do animals optimize the size-  
418 number trade-off when aging? Insights from reproductive senescence patterns in  
419 marmots. *Ecology* 96:46–53. <https://doi.org/10.1890/14-0774.1>
- 420 Blanco G, Frias O, Martinez J, Lemus JA, Merino R, Jimenez B (2006). Sex and rank in  
421 competitive brood hierarchies influence stress levels in nestlings of a sexually dimorphic  
422 bird. *Biol J Linnean Soc* 88:383–390. <https://doi.org/10.1111/j.1095-8312.2006.00625.x>
- 423 Blumstein D T, Williams D M, Lim A N, Kroeger S, Martin J G (2018). Strong social  
424 relationships are associated with decreased longevity in a facultatively social mammal.  
425 *Proc R Soc B: Biol Sci* 285:20171934.
- 426 Bonier F, Martin PR (2016). How can we estimate natural selection on endocrine traits? Lessons  
427 from evolutionary biology. *Proc R Soc B-Biol Sci* 283:20161887.  
428 <https://doi.org/10.1098/rspb.2016.1887>

- 429 Boonstra R, Hik D, Singleton GR, Tinnikov A (1998). The impact of predator-induced stress on  
430 the snowshoe hare cycle. *Ecol Monogr* 68:371–394. [https://doi.org/10.1890/0012-](https://doi.org/10.1890/0012-9615(1998)068[0371:TIOPIS]2.0.CO;2)  
431 [9615\(1998\)068\[0371:TIOPIS\]2.0.CO;2](https://doi.org/10.1890/0012-9615(1998)068[0371:TIOPIS]2.0.CO;2)
- 432 Breuner CW, Orchinik M (2002). Plasma binding proteins as mediators of corticosteroid action  
433 in vertebrates. *J Endocrinol* 175:99–112. <https://doi.org/10.1677/joe.0.1750099>
- 434 Breuner C W, Patterson S H, Hahn T P (2008). In search of relationships between the acute  
435 adrenocortical response and fitness. *Gen Comp Endocrinol* 157:288-295.
- 436 Brotherton PNM, Clutton-Brock TH, O’Riain MJ, Gaynor D, Sharpe L, Kansky R, McIlrath GM  
437 (2001). Offspring food allocation by parents and helpers in a cooperative mammal. *Behav*  
438 *Ecol* 12:590–599. <https://doi.org/10.1093/beheco/12.5.590>
- 439 Brown JL 1987. Helping and communal breeding in birds. *Ecol Evol*. Princetown University  
440 Press, Princetown, New Jersey.
- 441 Bugajski J, Gadek-Michalska A, Borycz J (1993). Social crowding stress diminishes the  
442 pituitary-adrenocortical and hypothalamic histamine response to adrenergic stimulation. *J*  
443 *Physiol Pharmacol* 44:447–456.
- 444 Cameron EZ (2004). Facultative adjustment of mammalian sex ratios in support of the Trivers-  
445 Willard hypothesis: evidence for a mechanism. *Proc R Soc B-Biol Sci* 271:1723–1728.  
446 <https://doi.org/10.1098/rspb.2004.2773>
- 447 Clutton-Brock TH, Brotherton PNM, O’Riain MJ, Griffin AS, Gaynor D, Sharpe L, Kansky R,  
448 Manser MB, McIlrath GM (2000). Individual contributions to babysitting in a  
449 cooperative mongoose, *Suricata suricatta*. *Proc R Soc B-Biol Sci* 267:301–305.

- 450 Clutton-Brock TH, Russell AF, Sharpe LL, Brotherton PNM, McIlrath GM, White S, Cameron,  
451 EZ (2001). Effects of helpers on juvenile development and survival in meerkats. *Science*  
452 293:2446–2449. <https://doi.org/10.1126/science.1061274>
- 453 Cockrem JF (2013). Individual variation in glucocorticoid stress responses in animals. *Gen*  
454 *Comp Endocrinol* 181:45–58. <https://doi.org/10.1016/j.ygcen.2012.11.025>
- 455 Cohas A, Yoccoz NG, Da Silva A, Goossens B, Allainé D (2006). Extra-pair paternity in the  
456 monogamous alpine marmot (*Marmota marmota*): the roles of social setting and female  
457 mate choice. *Behav Ecol Sociobiol* 59:597–605. [https://doi.org/10.1007/s00265-005-](https://doi.org/10.1007/s00265-005-0086-8)  
458 0086-8
- 459 Creel S, Dantzer B, Goymann W, Rubenstein DR (2013). The ecology of stress: effects of the  
460 social environment. *Funct Ecol* 27:66–80. [https://doi.org/10.1111/j.1365-](https://doi.org/10.1111/j.1365-2435.2012.02029.x)  
461 2435.2012.02029.x
- 462 Crespi EJ, Williams TD, Jessop TS, Delehanty B (2013). Life history and the ecology of stress:  
463 how do glucocorticoid hormones influence life-history variation in animals? *Funct Ecol*  
464 27:93–106. <https://doi.org/10.1111/1365-2435.12009>
- 465 de Kloet ER, Karst H, Joels M (2008). Corticosteroid hormones in the central stress response:  
466 Quick-and-slow. *Front Neuroendocrinol.* 29:268–272.  
467 <https://doi.org/10.1016/j.yfrne.2007.10.002>
- 468 Dickens M J, Romero L M (2013). A consensus endocrine profile for chronically stressed wild  
469 animals does not exist. *Gen Comp Endocrinol* 191:177-189.
- 470 Dixit T, English S, Lukas D (2017). The relationship between egg size and helper number in  
471 cooperative breeders: a meta-analysis across species. *PeerJ* 5, e4028.  
472 <https://doi.org/10.7717/peerj.4028>

- 473 Dulude de Broin F, Hamel S, Mastro Monaco G F, Côté S D (2020). Predation risk and  
474 mountain goat reproduction: Evidence for stress-induced breeding suppression in a wild  
475 ungulate. *Funct Ecol* 34:1003-1014
- 476 Dupont P, Pradel R, Lardy S, Allainé D, Cohas A (2015). Litter sex composition influences  
477 dominance status of Alpine marmots (*Marmota marmota*). *Oecologia* 179:753–763.  
478 <https://doi.org/10.1007/s00442-015-3375-6>
- 479 Emlen S, Emlen J, Levin S (1986). Sex-Ratio Selection in Species with Helpers-at-the-Nest. *Am*  
480 *Nat* 127:1–8. <https://doi.org/10.1086/284463>
- 481 Fey K, Trillmich F (2008). Sibling competition in guinea pigs (*Cavia aperea f. porcellus*):  
482 scrambling for mother's teats is stressful. *Behav Ecol Sociobiol* 62:321–329.  
483 <https://doi.org/10.1007/s00265-007-0419-x>
- 484 Gassen NC, Chrousos GP, Binder EB, Zannas AS (2017). Life stress, glucocorticoid signaling,  
485 and the aging epigenome: Implications for aging-related diseases. *Neurosci Biobehav*  
486 *Rev* 74:356–365. <https://doi.org/10.1016/j.neubiorev.2016.06.003>
- 487 Grace JK, Anderson DJ (2018). Early-life maltreatment predicts adult stress response in a long-  
488 lived wild bird. *Biol Lett* 14:20170679. <https://doi.org/10.1098/rsbl.2017.0679>
- 489 Hammers M, Kingma S A, Spurgin L G, Bebbington K, Dugdale H L, Burke T, Komdeur Y,  
490 Richardson D S (2019). Breeders that receive help age more slowly in a cooperatively  
491 breeding bird. *Nature Comm* 10:1-10.
- 492 Hatchwell BJ (1999). Investment strategies of breeders in avian cooperative breeding systems.  
493 *Am Nat* 154:205–219. <https://doi.org/10.1086/303227>

- 494 Hennessy MB, Kaiser S, Sachser N (2009). Social buffering of the stress response: Diversity,  
495 mechanisms, and functions. *Front Neuroendocrinol* 30:470–482.  
496 <https://doi.org/10.1016/j.yfrne.2009.06.001>
- 497 Hodge SJ (2005). Helpers benefit offspring in both the short and long-term in the cooperatively  
498 breeding banded mongoose. *Proc R Soc B-Biol Sci* 272:2479–2484.  
499 <https://doi.org/10.1098/rspb.2005.3255>
- 500 Hudson R, Bautista A, Reyes-Meza V, Morales Montor J, Roedel HG (2011). The effect of  
501 siblings on early development: a potential contributor to personality differences in  
502 mammals. *Dev Psychobiol* 53:564–574. <https://doi.org/10.1002/dev.20535>
- 503 Kastner P R, Zatzman M L, South F E, Johnson J A (1977). Renin-angiotensin-aldosterone  
504 system of the normothermic marmot. *Am J Physiol Regul Integr Comp Physiol* 233:37-  
505 43.
- 506 Keller L, Reeve H (1994). Partitioning of Reproduction in Animal Societies. *Trends Ecol Evol*  
507 9:98–102. [https://doi.org/10.1016/0169-5347\(94\)90204-6](https://doi.org/10.1016/0169-5347(94)90204-6)
- 508 Koren L, Whiteside D, Fahlman Å, Ruckstuhl K, Kutz S, Checkley S, Dumond M, Wynne-  
509 Edwards K (2012). Cortisol and corticosterone independence in cortisol-dominant  
510 wildlife. *Gen Comp Endocrinol* 177:113-119.
- 511 Kuznetsova A, Brockhoff PB, Christensen RHB (2016). lmerTest: Tests in Linear Mixed Effects  
512 Models. R package version 2.0-33.
- 513 Lindström J (1999). Early development and fitness in birds and mammals. *Trends Ecol Evol*  
514 14:343–348. [https://doi.org/10.1016/S0169-5347\(99\)01639-0](https://doi.org/10.1016/S0169-5347(99)01639-0)
- 515 Liu D, Diorio J, Tannenbaum B, Caldji C, Francis D, Freedman A, Sharma S, Pearson D, Plotsky  
516 PM, Meaney MJ (1997). Maternal care, hippocampal glucocorticoid receptors, and

- 517 hypothalamic-pituitary-adrenal responses to stress. *Science* 277:1659–1662.  
518 <https://doi.org/10.1126/science.277.5332.1659>
- 519 Levine S (1994). The ontogeny of the hypothalamic-pituitary- adrenal axis: the influence of  
520 maternal factors. *New York Academy of Sciences* 740:275-288.
- 521 MacDougall-Shackleton SA, Schmidt KL, Furlonger AA, MacDougall-Shackleton EA (2013).  
522 HPA axis regulation, survival, and reproduction in free-living sparrows: Functional  
523 relationships or developmental correlations? *Gen Comp Endocrinol* 190:188–193.  
524 <https://doi.org/10.1016/j.ygcen.2013.05.026>
- 525 Macri S, Wuerbel H (2006). Developmental plasticity of HPA and fear responses in rats: A  
526 critical review of the maternal mediation hypothesis. *Horm Behav* 50:667–680.  
527 <https://doi.org/10.1016/j.yhbeh.2006.06.015>
- 528 Malkesman O, Maayan R, Weizman A, Weller A (2006). Aggressive behavior and HPA axis  
529 hormones after social isolation in adult rats of two different genetic animal models for  
530 depression. *Behav Brain Res* 175:408–414. <https://doi.org/10.1016/j.bbr.2006.09.017>
- 531 Monclús R, Tiulim J, Blumstein D T (2011). Older mothers follow conservative strategies under  
532 predator pressure: the adaptive role of maternal glucocorticoids in yellow-bellied  
533 marmots. *Horm Beav* 60:660-665.
- 534 McEwen BS, Wingfield JC (2003). The concept of allostasis in biology and biomedicine. *Horm*  
535 *Behav* 43:2–15. [https://doi.org/10.1016/S0018-506X\(02\)00024-7](https://doi.org/10.1016/S0018-506X(02)00024-7)
- 536 McKay LI, Cidlowski JA (2003). Physiologic and Pharmacologic Effects of Corticosteroids.  
537 *Holland-Frei cancer medicine*, 6.



- 538 McMillen IC, Robinson JS (2005). Developmental origins of the metabolic syndrome:  
539 Prediction, plasticity, and programming. *Physiol Rev* 85:571–633.  
540 <https://doi.org/10.1152/physrev.00053.2003>
- 541 Moisiadis VG, Matthews SG (2014). Glucocorticoids and fetal programming part 2:  
542 mechanisms. *Nat Rev Endocrinol* 10:403–411. <https://doi.org/10.1038/nrendo.2014.74>
- 543 Monaghan, P., Spencer, K.A., 2014. Stress and life history. *Curr. Biol.* 24, R408–R412.
- 544 Nicolaides NC, Kyratzi E, Lannprokostopoulou A, Chrousos GP, Charmandari E (2015). Stress,  
545 the Stress System and the Role of Glucocorticoids. *Neuroimmunomodulation* 22:6–19.  
546 <https://doi.org/10.1159/000362736>
- 547 Paquet M, Covas R, Chastel O, Parenteau C, Doutrelant C (2013). Maternal effects in relation to  
548 helper presence in the cooperatively breeding sociable weaver. *PLoS One* 8, e59336.  
549 <https://doi.org/10.1371/journal.pone.0059336>
- 550 Petelle M B, Dang B N, Blumstein D T (2017). The effect of maternal glucocorticoid levels on  
551 juvenile docility in yellow-bellied marmots. *Horm Behav* 89:86-91.
- 552 Pinho G M, Ortiz-Ross X, Reese A N, Blumstein D T (2019). Correlates of maternal  
553 glucocorticoid levels in a socially flexible rodent. *Horm Behav* 116:104577.
- 554 Price K, Kittridge C, Damby Z, Hayes S G, Addis E A (2018). Relaxing life of the city?  
555 Allostatic load in yellow-bellied marmots along a rural–urban continuum. *Conserv*  
556 *Physiol* 6:coy070.
- 557 R Core Team, 2014. R: A language and environment for statistical computing. R Foundation  
558 for Statistical Computing, Vienna, Austria.
- 559 Raihani NJ, Ridley AR (2008). Experimental evidence for teaching in wild pied babblers. *Anim*  
560 *Behav* 75, 3–11. <https://doi.org/10.1016/j.anbehav.2007.07.024>

- 561 Rey B (2020). Validation of the predation-stress hypothesis in a large mammal. *Funct Ecol*  
562 34:942-943. <https://doi.org/10.1111/1365-2435.13557>
- 563 Roedel HG, Meyer S, Prager G, Stefanski V, Hudson R (2010). Litter size is negatively  
564 correlated with corticosterone levels in weanling and juvenile laboratory rats. *Physiol*  
565 *Behav* 99:644–650. <https://doi.org/10.1016/j.physbeh.2010.01.032>
- 566 Romero LM (2004) Physiological stress in ecology: lessons from biomedical research. *Trends*  
567 *Ecol Evol* 19:249–255. <https://doi.org/10.1016/j.tree.2004.03.008>
- 568 Romero LM, Dickens MJ, Cyr NE (2009). The reactive scope model - A new model integrating  
569 homeostasis, allostasis, and stress. *Horm Behav* 55:375–389.  
570 <https://doi.org/10.1016/j.yhbeh.2008.12.009>
- 571 Sapolsky RM, Romero LM, Munck AU (2000). How do glucocorticoids influence stress  
572 responses? Integrating permissive, suppressive, stimulatory, and preparative actions.  
573 *Endocr Rev* 21, 55–89. <https://doi.org/10.1210/er.21.1.55>
- 574 Seckl JR (2004). Prenatal glucocorticoids and long-term programming. *Eur J Endocrinol*  
575 151:49–62.
- 576 Taff CC, Vitousek MN (2016). Endocrine Flexibility: Optimizing Phenotypes in a Dynamic  
577 World? *Trends Ecol Evol* 31:476–488. <https://doi.org/10.1016/j.tree.2016.03.005>
- 578 Tuchscherer M, Kanitz E, Tuchscherer A, Puppe B (2016). Effects of social support on  
579 glucocorticoid sensitivity of lymphocytes in socially deprived piglets. *Stress* 19:325–332.  
580 <https://doi.org/10.1080/10253890.2016.1179276>
- 581 Uchino BN, Cacioppo JT, KiecoltGlaser JK (1996). The relationship between social support and  
582 physiological processes: A review with emphasis on underlying mechanisms and

583           implications for health. *Psychol. Bull.* 119:488–531. <https://doi.org/10.1037/0033->  
584           2909.119.3.488

585 Venables WN, Ripley BD (2002). *Modern Applied Statistics with S*, 4th edition. Springer-  
586           Verlag, New York, USA.

587 Wingfield JC (2008). Comparative endocrinology, environment and global change. *Gen Comp*  
588           *Endocrinol* 157:207–216. <https://doi.org/10.1016/j.ygcen.2008.04.017>

589 Wingfield JC (2003). Control of behavioural strategies for capricious environments. *Anim Behav*  
590           66:807–815. <https://doi.org/10.1006/anbe.2003.2298>

591 Wingfield JC, Maney DL, Breuner CW, Jacobs JD, Lynn S, Ramenofsky M, Richardson RD,  
592           (1998). Ecological bases of hormone-behavior interactions: The “emergency life history  
593           stage.” *Am Zool* 38:191–206.

**Table 1** Pearson coefficients of correlation between the different corticosterone levels measured and both adrenal reactivity to ACTH and adrenal suppression by dexamethasone. Significant correlations are in bold ( $p < 0.05$ ).

|                                           | Suppressed corticosterone level                                                                     | Stimulated corticosterone level                                                                     | Adrenal suppression by dexamethasone                                                                    | Adrenal reactivity to ACTH                                                                            |
|-------------------------------------------|-----------------------------------------------------------------------------------------------------|-----------------------------------------------------------------------------------------------------|---------------------------------------------------------------------------------------------------------|-------------------------------------------------------------------------------------------------------|
| Corticosterone at dexamethasone injection | <b>0.65</b><br><b>95% CI [ 0.43;0.79]</b><br><b>t = 5.54</b><br><b>N = 45</b><br><b>p &lt; 0.01</b> | <b>0.68</b><br><b>95% CI [ 0.48;0.82]</b><br><b>t = 6.01</b><br><b>N = 43</b><br><b>p &lt; 0.01</b> | <b>-0.85</b><br><b>95% CI [ -0.92;-0.74]</b><br><b>t = 10.67</b><br><b>N = 45</b><br><b>p &lt; 0.01</b> | <b>0.51</b><br><b>95% CI [ 0.24;0.70]</b><br><b>t = 3.75</b><br><b>N = 43</b><br><b>p &lt; 0.01</b>   |
| Suppressed corticosterone level           |                                                                                                     | <b>0.76</b><br><b>95% CI [ 0.59;0.87]</b><br><b>t = 7.55</b><br><b>N = 43</b><br><b>p &lt; 0.01</b> | -0.15<br>95% CI [-0.43;0.16]<br>t = 1.00<br>N = 45<br>p = 0.33                                          | <b>0.38</b><br><b>95% CI [0.08; 0.62]</b><br><b>t = 2.63</b><br><b>N = 43</b><br><b>p = 0.01</b>      |
| Stimulated corticosterone level           |                                                                                                     |                                                                                                     | <b>-0.38</b><br><b>95% CI [-0.62;-0.09]</b><br><b>t = 2.67</b><br><b>N = 43</b><br><b>p = 0.01</b>      | <b>0.89</b><br><b>95% CI [0.79;0.94]</b><br><b>t = 12.29</b><br><b>N = 43</b><br><b>p &lt; 0.01</b>   |
| Adrenal suppression by dexamethasone      |                                                                                                     |                                                                                                     |                                                                                                         | <b>-0.41</b><br><b>95% CI [-0.63;-0.11]</b><br><b>t = 2.84</b><br><b>N = 43</b><br><b>p &lt; 0.01</b> |

**Table 2** Effect of the litter size and composition as well as of the number of helpers on HPA responsiveness and plasma corticosterone levels of Alpine marmot pups subjected to dexamethasone suppression and ACTH stimulation tests. Significant effects are in bold ( $p < 0.05$ ).

| Fixed effects     | Adrenal suppression by dexamethasone<br>N = 45 |             |             | Suppressed corticosterone level<br>N = 45 |         |         | Adrenal reactivity to ACTH<br>N = 43 |             |              | Stimulated corticosterone level<br>N = 43 |             |             |
|-------------------|------------------------------------------------|-------------|-------------|-------------------------------------------|---------|---------|--------------------------------------|-------------|--------------|-------------------------------------------|-------------|-------------|
|                   | Estimate ± SE                                  | t value     | p-value     | Estimate ± SE                             | t value | p-value | Estimate ± SE                        | t value     | p-value      | Estimate ± SE                             | t value     | p-value     |
| Intercept         | 8.01 ± 10.92                                   | 0.73        | 0.48        | 1329 ± 1055                               | 1.26    | 0.23    | -10.05 ± 13.93                       | 0.72        | 0.47         | -370 ± 1335                               | 0.23        | 0.78        |
| Age               | 0.44 ± 2.52                                    | 0.18        | 0.87        | 260 ± 217                                 | 1.20    | 0.24    | -6.27 ± 4.20                         | 1.49        | 0.24         | -302 ± 402                                | 0.75        | 0.46        |
| Sex (male)        | 0.74 ± 2.97                                    | 0.25        | 0.81        | -95 ± 247                                 | 0.39    | 0.70    | -0.96 ± 5.55                         | 0.17        | 0.86         | -20 ± 532                                 | 0.04        | 0.97        |
| Sex-ratio         | -7.97 ± 9.36                                   | 0.85        | 0.41        | 1206 ± 911                                | 1.32    | 0.21    | 17.98 ± 12.48                        | 1.44        | 0.16         | 1973 ± 1196                               | 1.65        | 0.11        |
| Litter size       | 1.94 ± 2.33                                    | 0.83        | 0.42        | -16 ± 224                                 | 0.07    | 0.84    | <b>6.65 ± 3.08</b>                   | <b>2.16</b> | <b>0.04</b>  | <b>623 ± 296</b>                          | <b>2.11</b> | <b>0.04</b> |
| Number of helpers | <b>-2.98 ± 1.29</b>                            | <b>2.31</b> | <b>0.04</b> | 11 ± 126                                  | 0.09    | 0.93    | <b>5.50 ± 1.63</b>                   | <b>3.36</b> | <b>0.002</b> | 276 ± 157                                 | 1.76        | 0.09        |

### Figure captions

**Figure 1** (a) Schematic representation of the stress response through the hypothalamic-pituitary-adrenal (HPA) axis. The stressor may be environmental, physical or psychological. It causes secretion of corticotropin-releasing hormone (CRH) by the hypothalamus. Under CRH stimulation, the pituitary gland releases adrenocorticotrophic hormone (ACTH) into the bloodstream that in turn stimulates glucocorticoid secretion by the adrenal gland. Glucocorticoids retroact at the hypothalamus and pituitary gland levels inhibiting CRH and ACTH release. Following HPA axis stimulation, if the negative feedback mechanism works efficiently, plasma stress hormones rapidly returns to baseline level. (b) Illustration of the experimental protocol. Plasma glucocorticoid concentration rises following capture. Injection of dexamethasone leads to the suppression of the glucocorticoid secretion by the adrenal gland. The rate of dexamethasone-induced decrease of plasma glucocorticoid probes the efficiency of the negative feedback and the ability of the HPA axis to return to baseline level. The injection of ACTH, on the other hand, triggers a strong transient increase in plasma glucocorticoid concentration, an effect that reveals the reactivity of the adrenal gland.

**Figure 2** Effects of the number of helpers (a) on the adrenal suppression by dexamethasone (measured as plasma corticosterone disappearance following dexamethasone administration) and (b) on the adrenal reactivity to ACTH (measured as plasma corticosterone appearance following ACTH administration) of Alpine marmot pups. Black dots represent residuals (a) of the adrenal suppression by dexamethasone or of (b) adrenal reactivity to ACTH per number of helpers after controlling for other effects. Line represents the model predictions (black) and their associated standard errors (dotted).

**Figure 3** Effects of the litter size on the adrenal reactivity to ACTH of Alpine marmot pups. Black dots represent residual adrenal reactivity to ACTH after controlling for the effects of the number of helpers. Line represents the model predictions (black) and their associated standard errors (dotted).

**Figure 1**

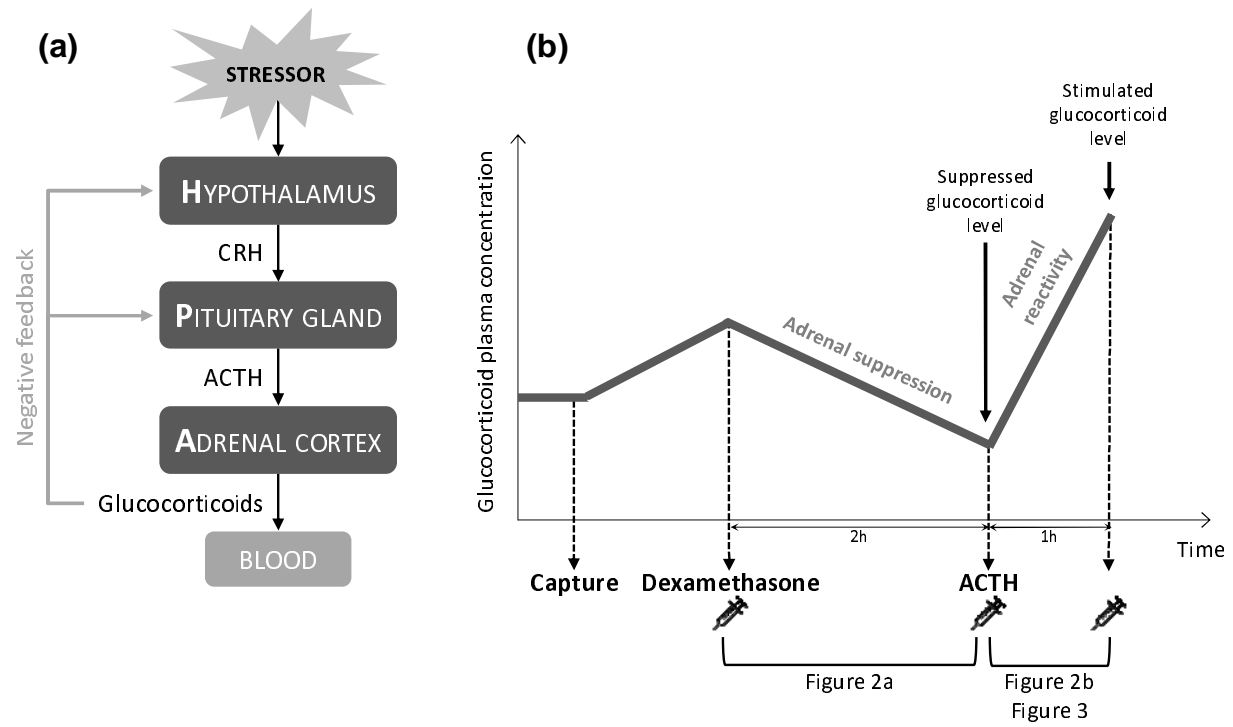



**Figure 2**

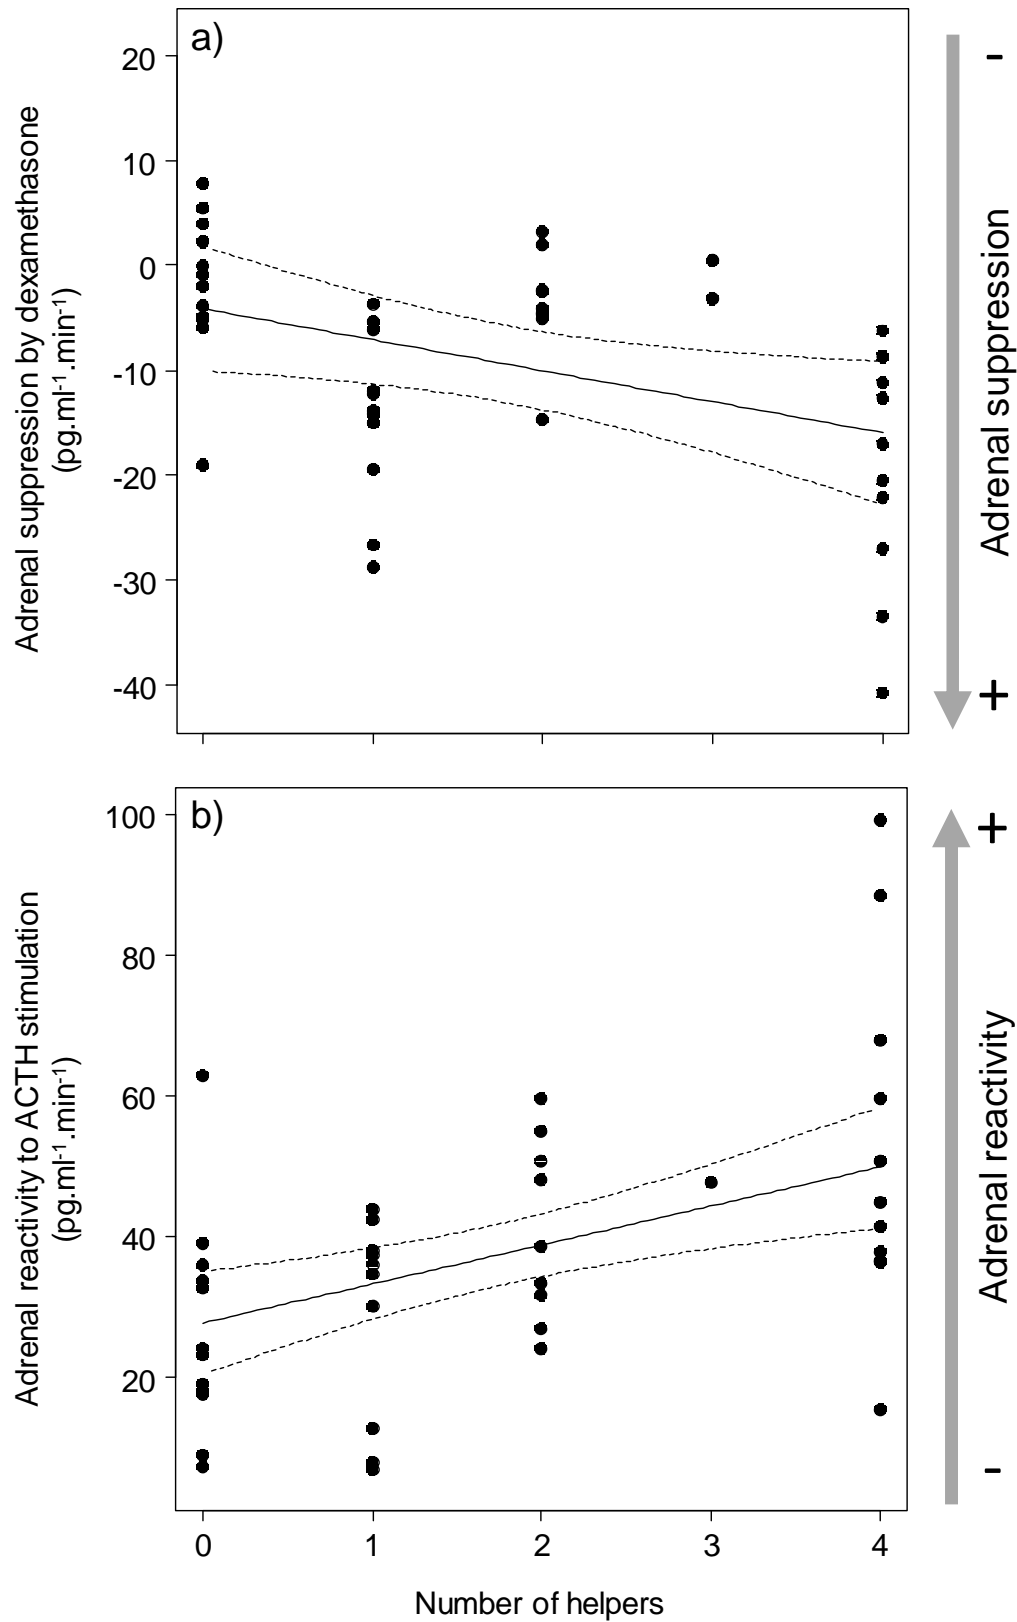

**Figure 3**

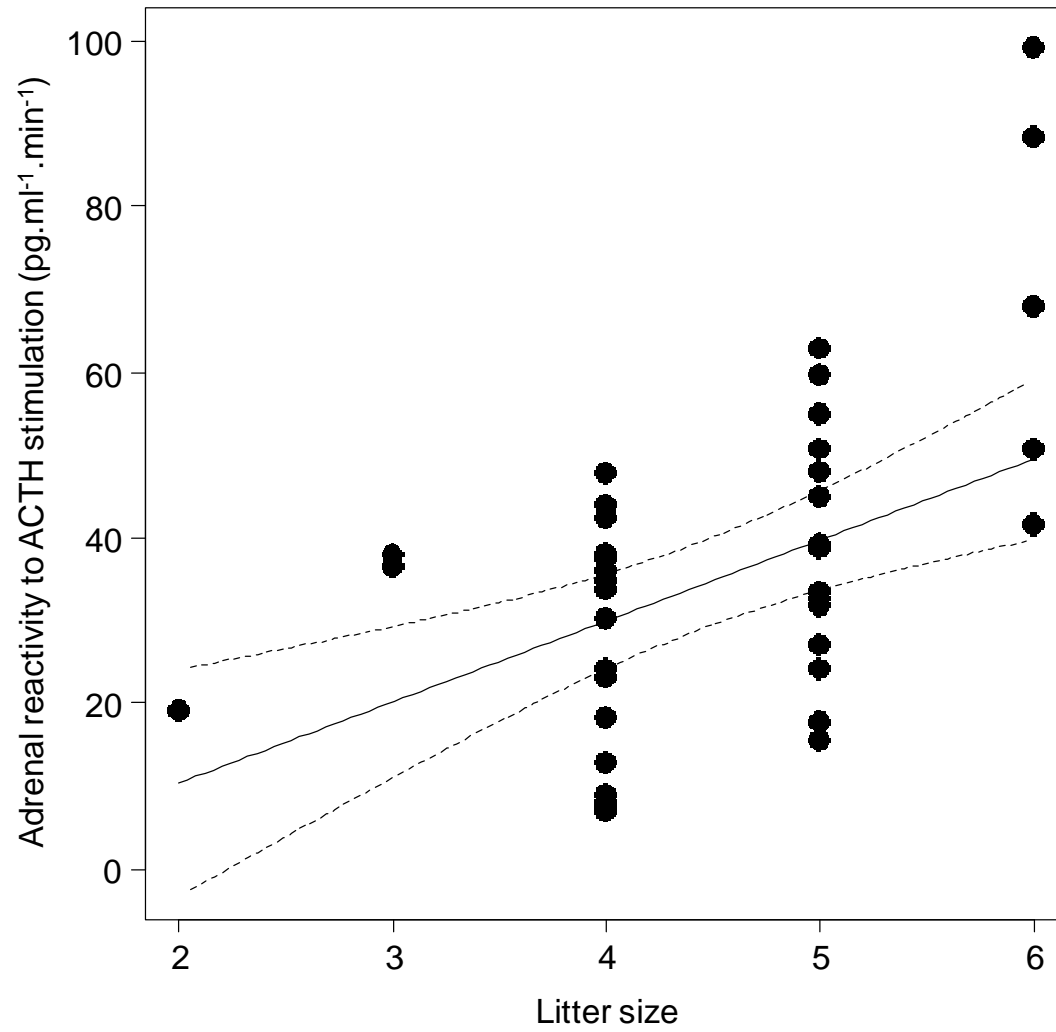

Source: http://biorxiv.org/content/10.1101/2021.06.11.448015v1.full.pdf
